# Supplementary material for: Trends in N 2 O and SF 6 mole fractions in archived air samples from Cape Meares, Oregon (USA), 1978–1996
Source: Copernicus journal article supplement (doi:10.5194/acp-19-8967-2019), 2019-07-16
Supplement: Supplementary file 1 [file acp-19-8967-2019-supplement.pdf]

Supplement of Atmos. Chem. Phys., 19, 8967–8977, 2019  
<https://doi.org/10.5194/acp-19-8967-2019-supplement>  
© Author(s) 2019. This work is distributed under  
the Creative Commons Attribution 4.0 License.

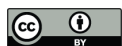

*Supplement of*

## **Trends in N<sub>2</sub>O and SF<sub>6</sub> mole fractions in archived air samples from Cape Meares, Oregon (USA), 1978–1996**

**Terry C. Rolfe and Andrew L. Rice**

*Correspondence to:* Terry C. Rolfe (trolfe@pdx.edu)

The copyright of individual parts of the supplement might differ from the CC BY 4.0 License.

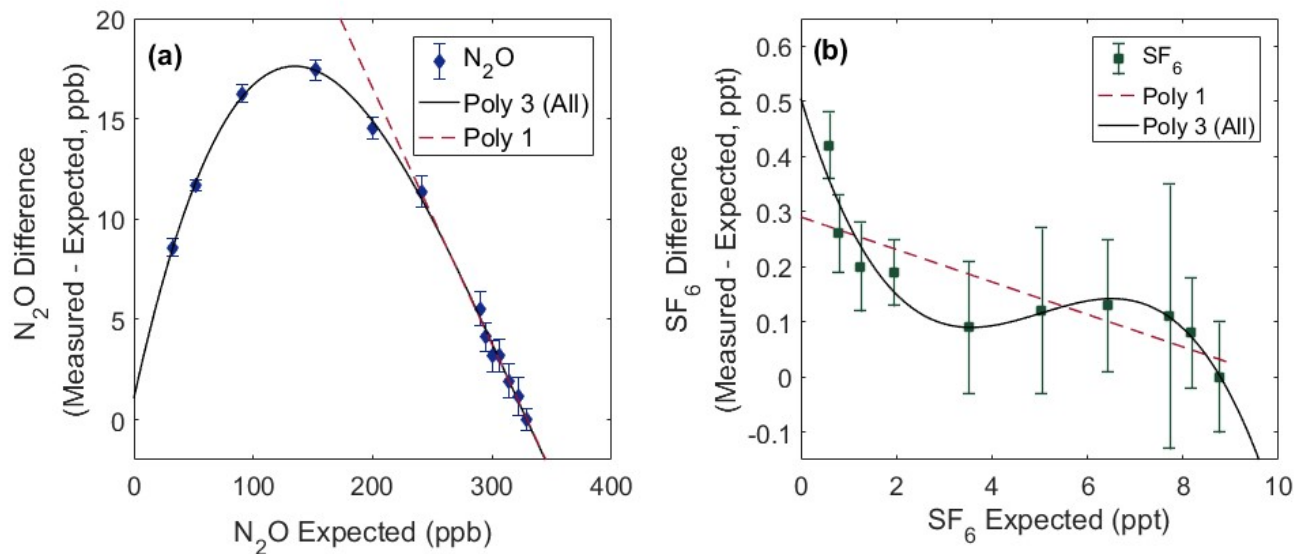

**Figure S1.** Mole fraction difference from expected plots for  $N_2O$  (a) and  $SF_6$  (b) detector response calibration measurements. Solid black lines are 3<sup>rd</sup>-degree polynomials fit to the whole data range. For  $N_2O$ , 1<sup>st</sup>-degree polynomial fit (red-dashed line) is only fit to data with mole fractions expected to be greater than 295 ppb. For  $SF_6$ , 1<sup>st</sup>-degree polynomial fit spans the entire data range.

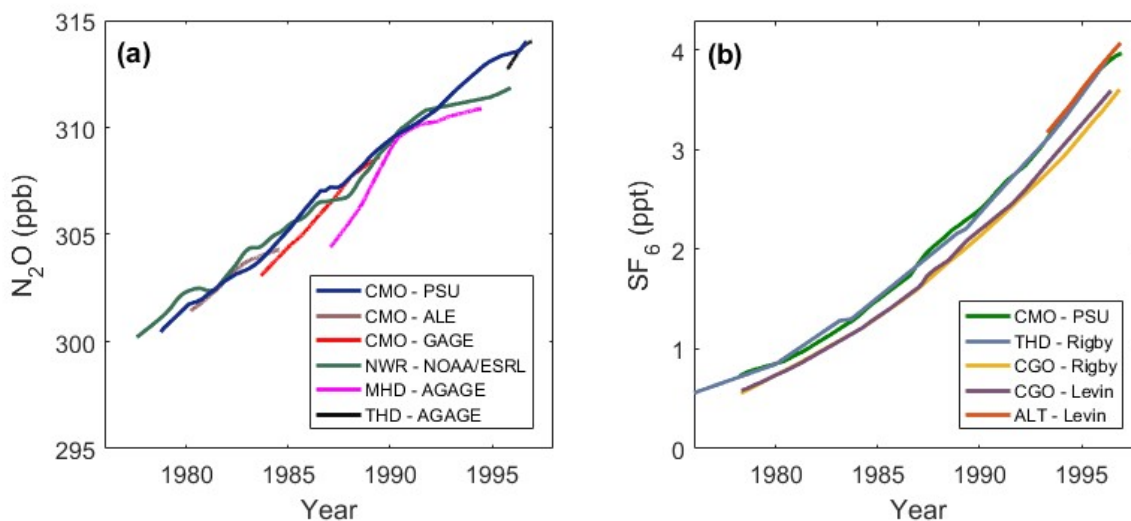

**Figure S2.** 3-year LOWESS regressions of measurements of mole fraction versus date of collection,  $N_2O$  (a) and  $SF_6$  (b). Station codes: CMO = Cape Meares, Oregon, USA, NWR = Niwot Ridge, Colorado, USA, MHD = Mace Head, Ireland, THD = Trinidad Head, California, USA, CGO = Cape Grim, Tasmania, ALT = Alert, Canada.  $N_2O$  data sources:

Atmospheric Lifetime Experiment (ALE, now AGAGE), Massachusetts Institute of Technology, Building 54-1312 Cambridge, MA 02139-2307, <https://agage.mit.edu/>; Global Atmospheric Gases Experiment (GAGE, now AGAGE), Massachusetts Institute of Technology, Building 54-1312 Cambridge, MA 02139-2307, <https://agage.mit.edu/>; National Oceanic and Atmospheric Association / Earth System Research Laboratory (NOAA/ESRL), 325 Broadway Boulder, CO 80305-3337, <http://www.cmdl.noaa.gov/index.html>; Advanced Global Atmospheric Gases Experiment Science Team (AGAGE), Massachusetts Institute of Technology, Building 54-1312 Cambridge, MA 02139-2307, <https://agage.mit.edu/>. N<sub>2</sub>O data collected from World Data Center for Greenhouse Gases (WDCGG) <https://gaw.kishou.go.jp/>. SF<sub>6</sub> data is digitized from plots in Rigby et al. 2010 and Levin et al. 2010.
